# Supplementary material
Source: publisher figshare collection journal article supplement (https://acs.figshare.com/ndownloader/files/4282992)
Supplement: Supplementary file 1 [file 4282992]

## Supporting Information

### Water-Soluble Conjugated Polymers for Amplification of One- and Two-photon Properties of Photosensitizers

*Fang He,<sup>#</sup> Xinsheng Ren, Xiaoqin Shen, and Qing-Hua Xu \**

Department of Chemistry, National University of Singapore, 3 Science Drive 3,  
Singapore 117543

<sup>#</sup>Current address: School of Materials Science and Engineering, University of Science  
and Technology Beijing, Beijing, 100083, P. R. China.

E-mail: [chmxqh@nus.edu.sg](mailto:chmxqh@nus.edu.sg)

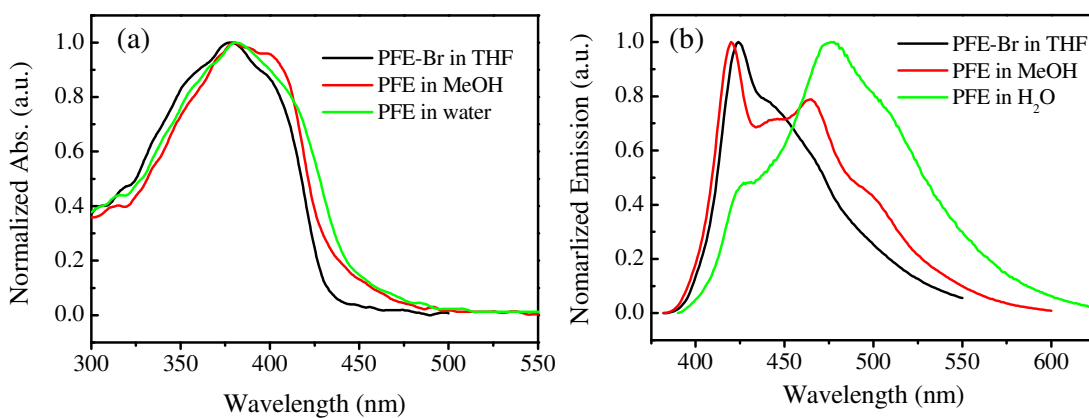

Figure S1, Absorption (a) and emission (b) spectra of PFE-Br in THF, methanol and water solution. Excitation wavelength: 383 nm.

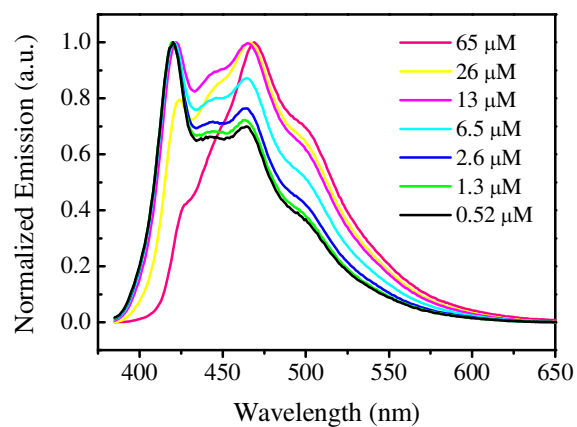

Figure S2, Emission spectra of PFE in methanol at different concentrations (Excitation wavelength: 383 nm).

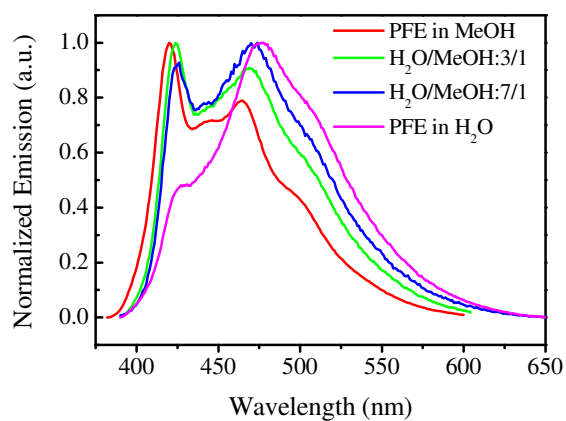

Figure S3, Emission spectra of PFE in methanol, water, and water/methanol mixture (Excitation wavelength: 383 nm).
